# Supplementary material
Source: PubMed Central journal article supplement (PMC3446812)

# Other

# Proteobacteria

# Bacteroidetes

# Firmicutes

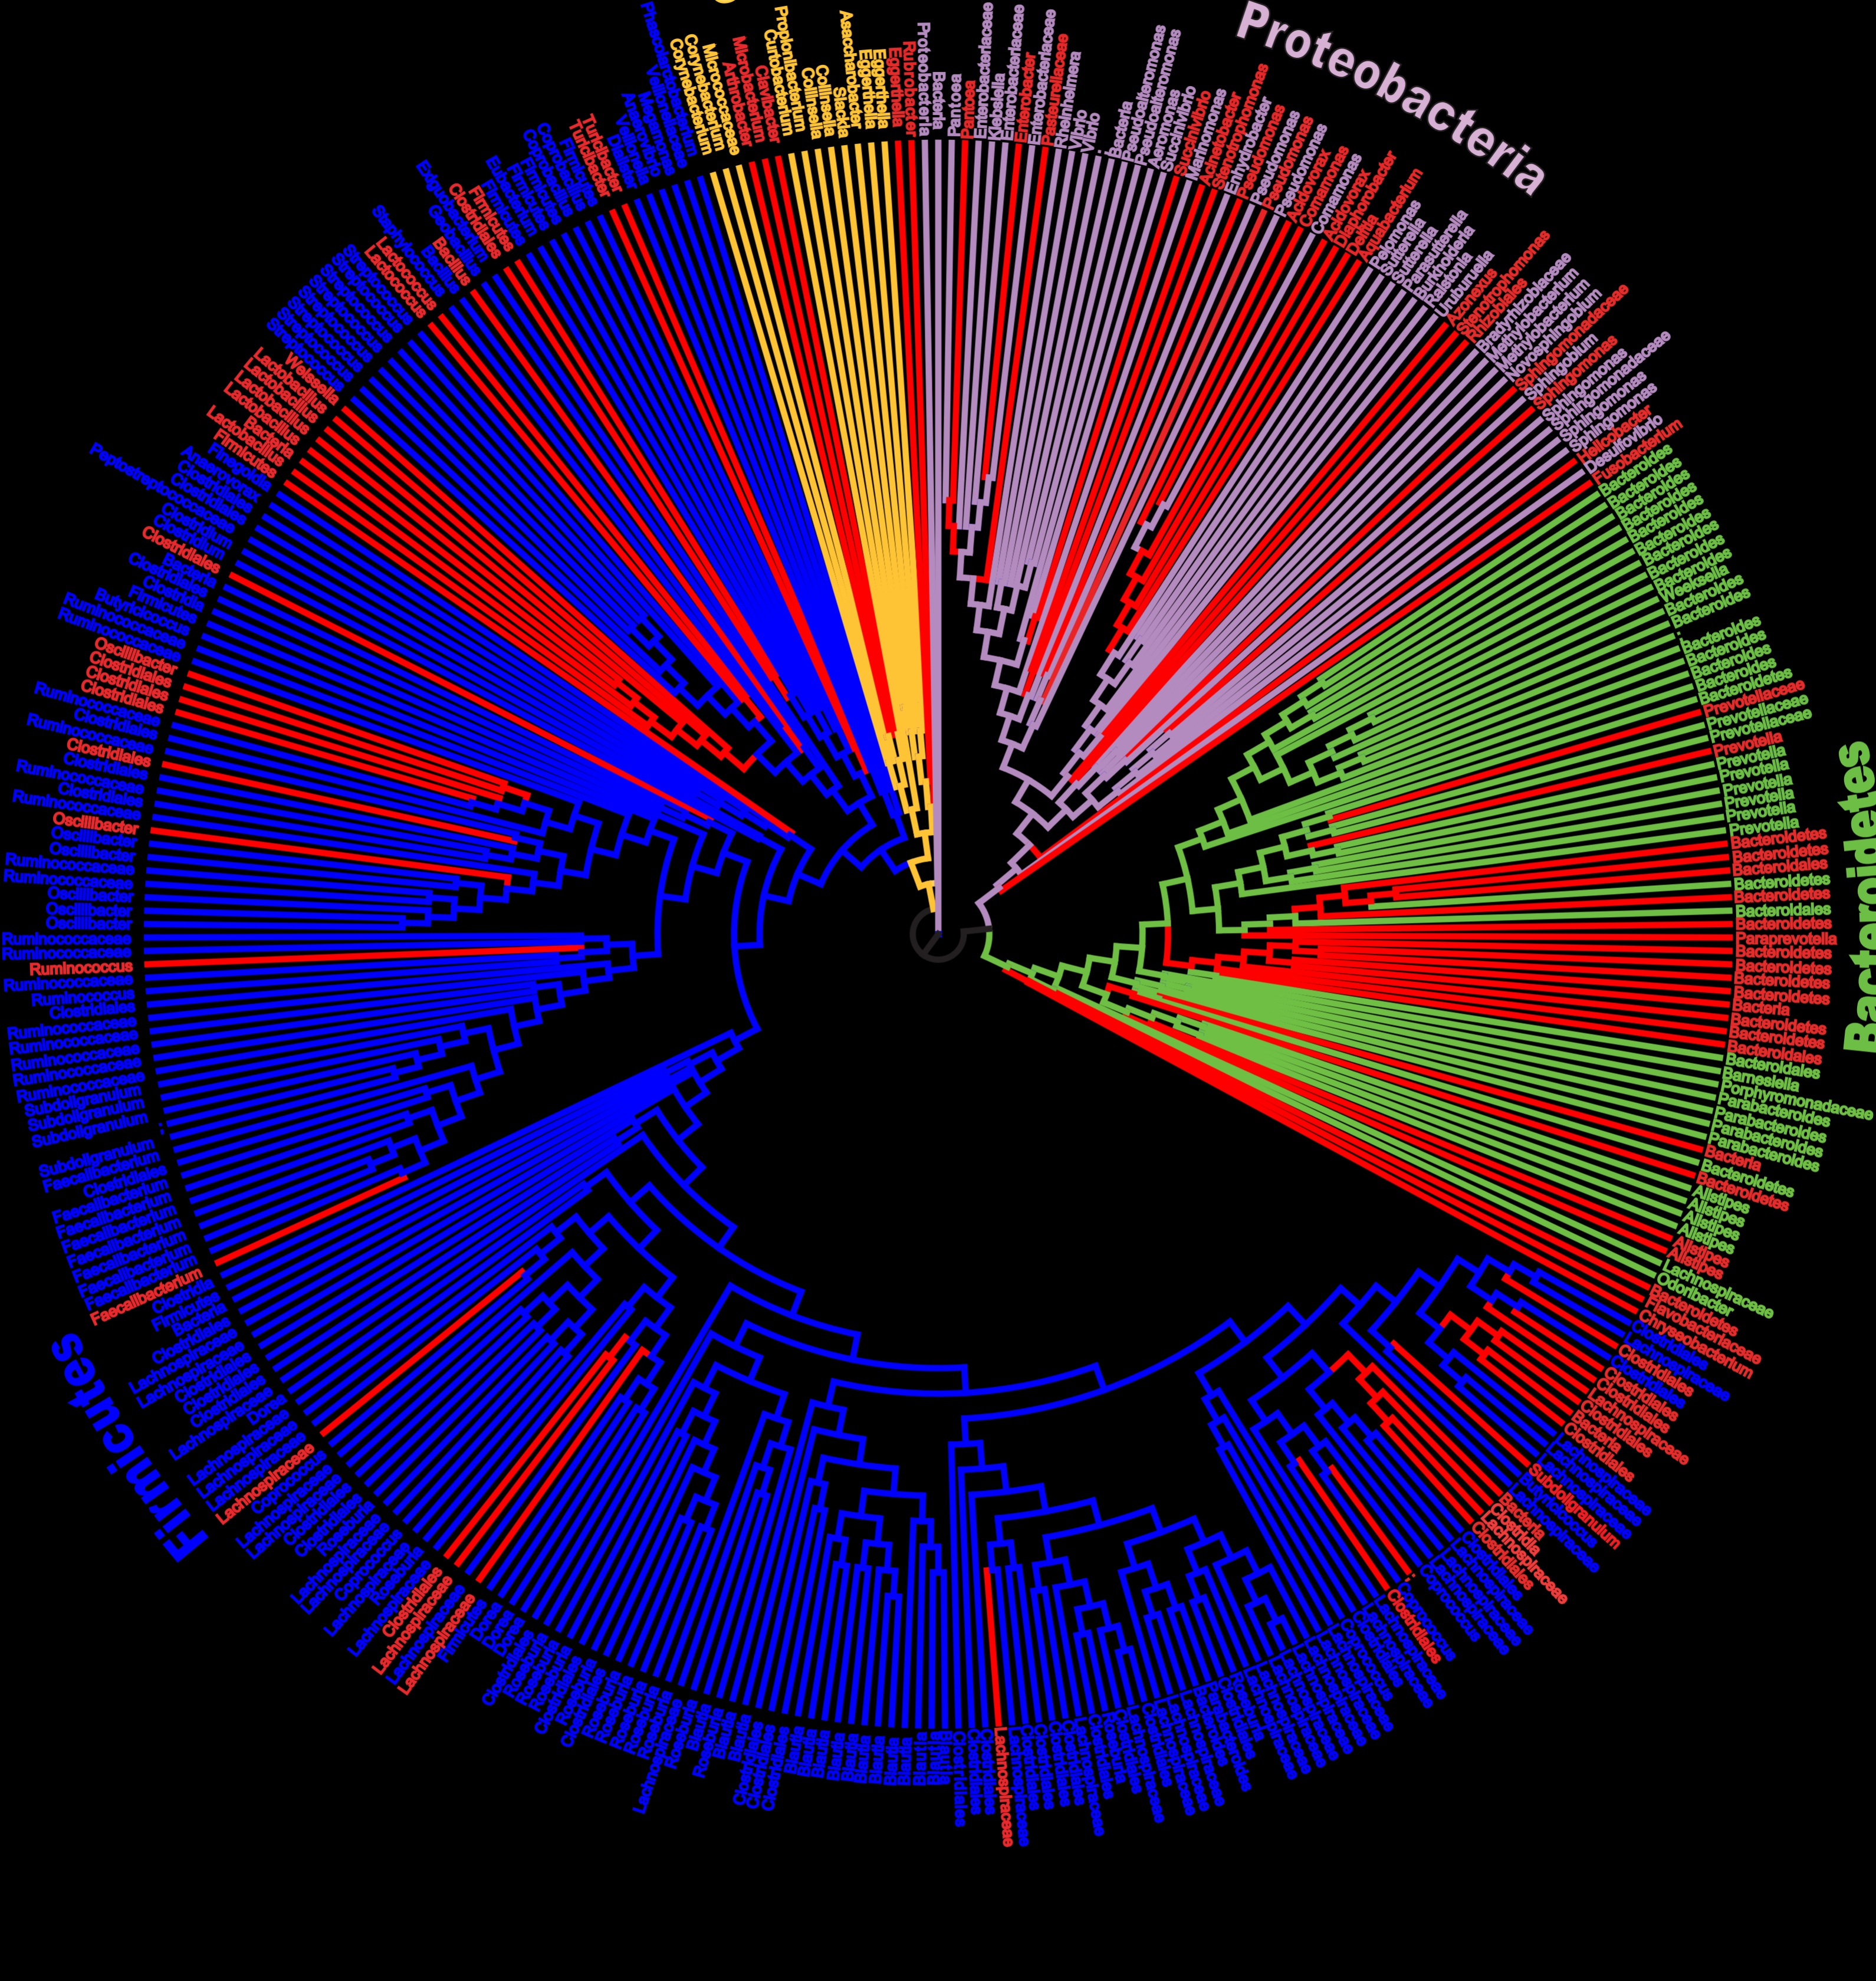

Supplement: ismej201243x2.pdf [file ismej201243x2.pdf]
